# Supplementary material for: Hypoxic human proximal tubular epithelial cells undergo ferroptosis and elicit an NLRP3 inflammasome response in CD1c+ dendritic cells
Source: PubMed Central journal article supplement (PMC9420140; doi:10.1038/s41419-022-05191-z), 2022-08-27

**FIGURE 1C - Full-length Western Blot**

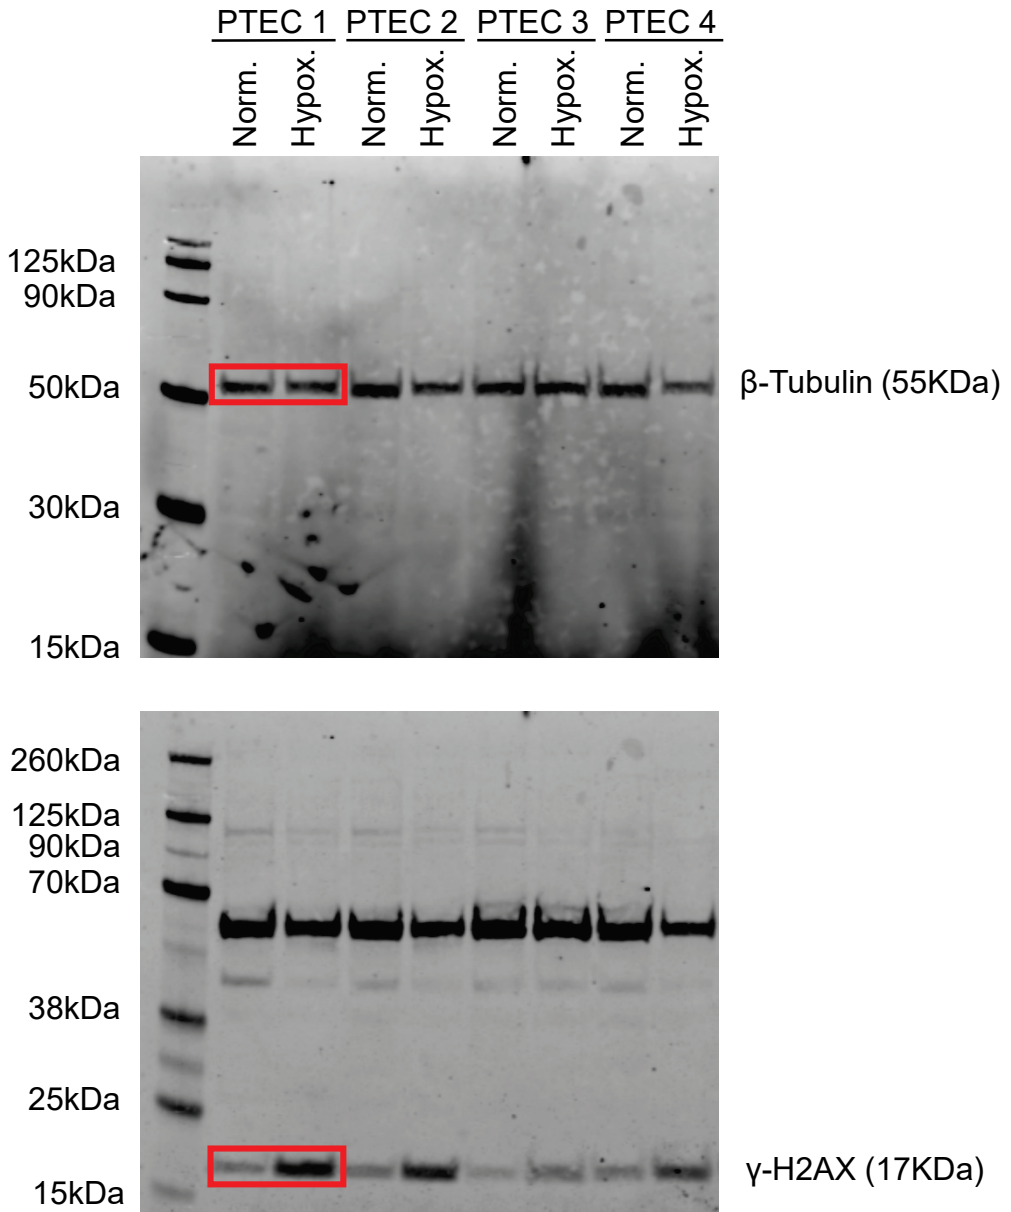

**FIGURE 2B - Full-length Western Blot**

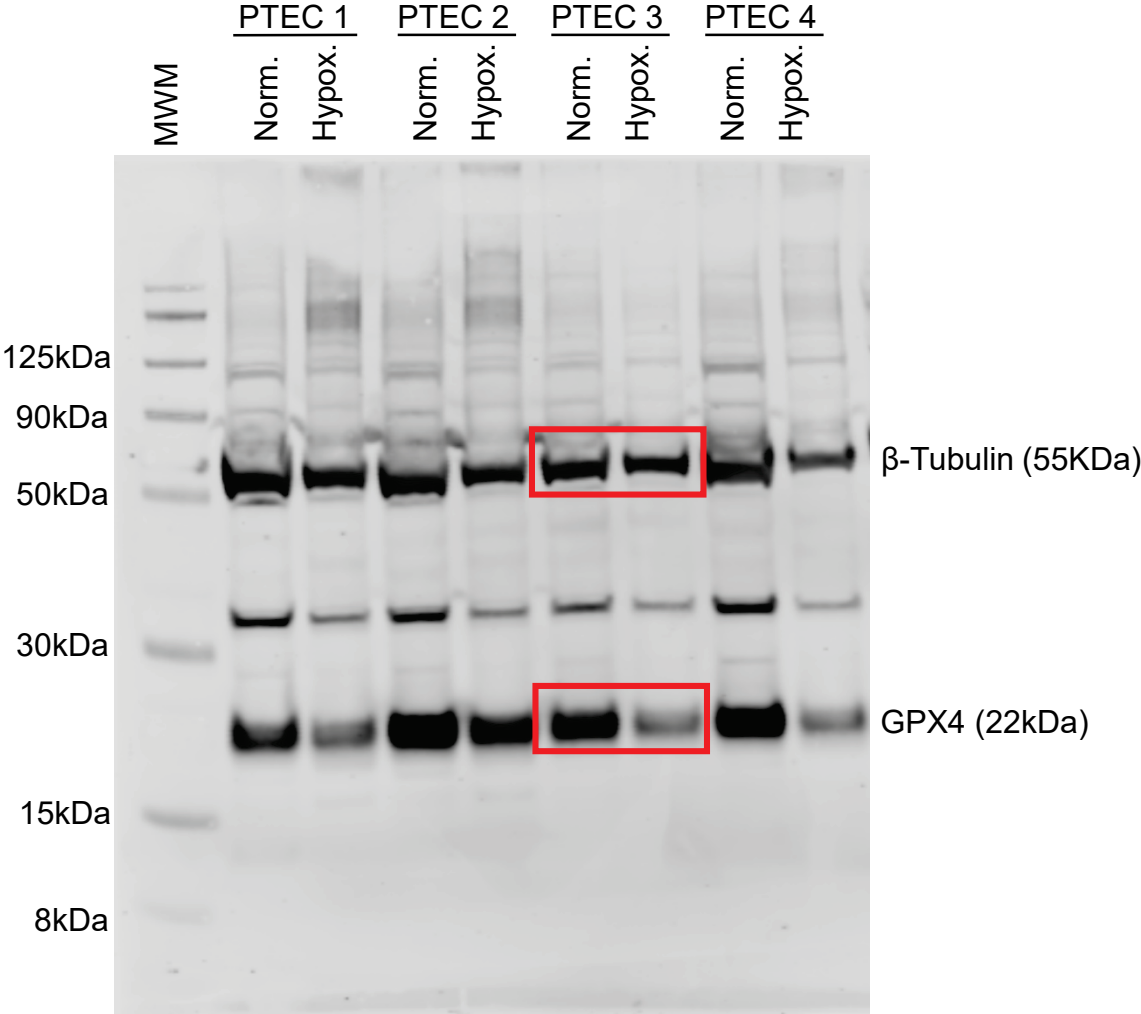

Supplement: 41419_2022_5191_MOESM2_ESM.pdf [file 41419_2022_5191_MOESM2_ESM.pdf]
